# Supplementary material for: Synthesis of 3,4-diaminobenzenethiol and its application in gold nanoparticle-based colorimetric determination of copper ions
Source: Royal Society of Chemistry journal article supplement (doi:10.1039/c6ra13681h), 2016-01-01
Supplement: c6ra13681h1.pdf [file c6ra13681h1.pdf]

## Supporting Information

# Synthesis of 3,4-Diaminobenzenethiol and Its Application in Gold Nanoparticle-based Colorimetric Determination of Copper Ions

Chi Zhang,<sup>a</sup> Li-Qiang Lu,<sup>a\*</sup> Pan Deng,<sup>a</sup> Xi-Ke Tian,<sup>a\*</sup> Ming-Yang Liu,<sup>b</sup> Ai-Ming Li<sup>b</sup>

<sup>a</sup>Nano-Mineral Materials and Application Engineering Research Center of Ministry of Education, Faculty of Materials Science and Chemistry, China University of Geosciences, Wuhan 430074, P. R. China. E-mail: llqdic@cug.edu.cn

<sup>b</sup>Hubei Environment Monitoring Center, Wuhan 430072, P. R. China

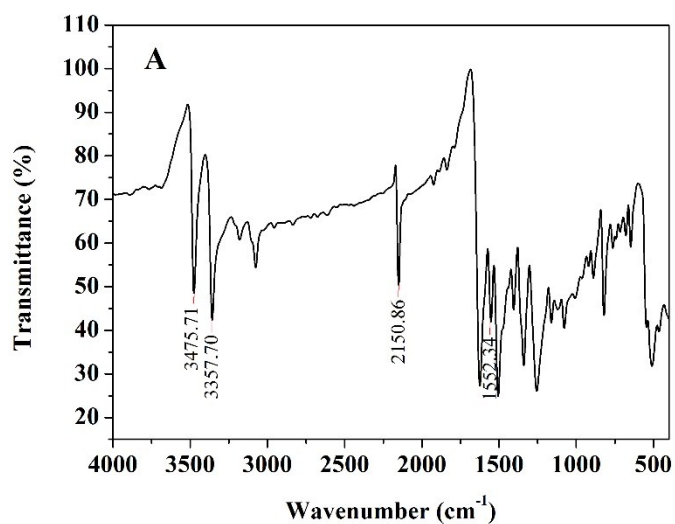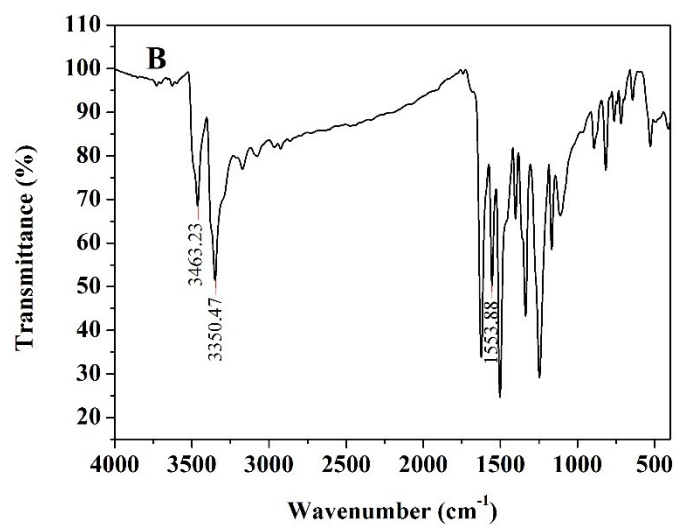

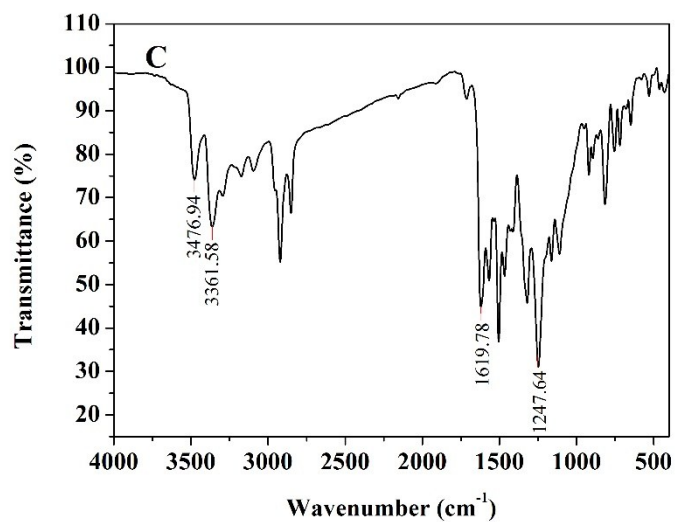

Fig. S1 FTIR spectra of synthetic products. (A) 2-nitro-4-thiocyananiline; (B) 4-amino-3-nitrobenzenethiol; (C) 3,4-diaminobenzenethiol.

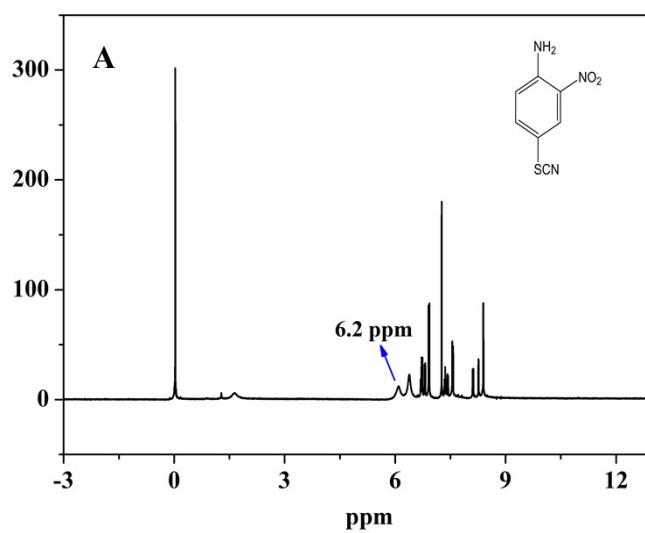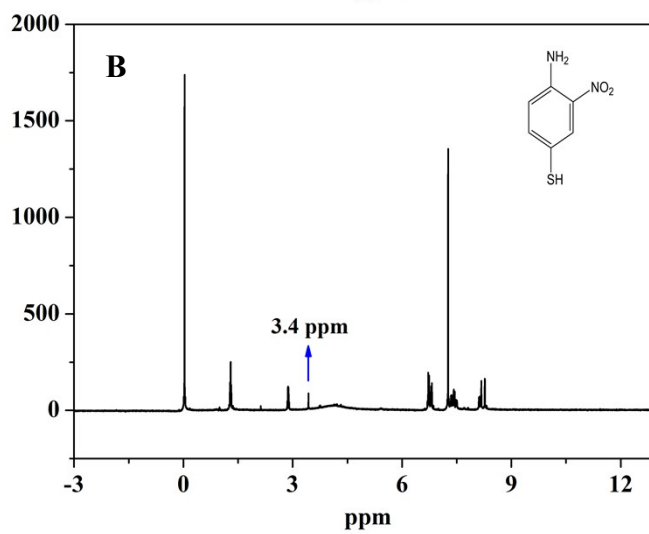

Fig. S2 <sup>1</sup>H NMR spectra of synthetic products. (A) 2-nitro-4-thiocyananiline; (B) 4-amino-3-nitrobenzenethiol.

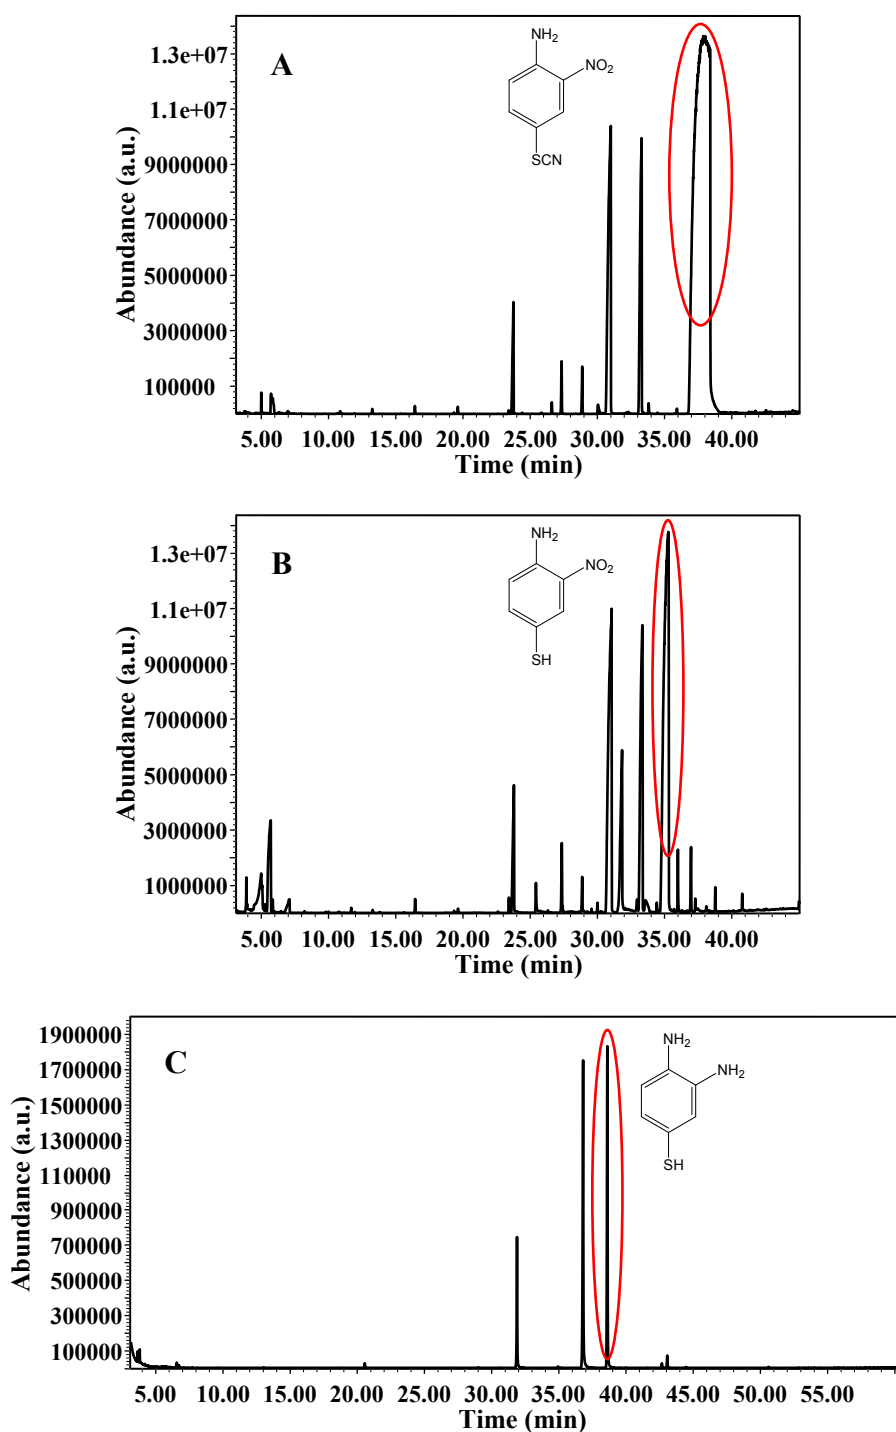

Fig. S3 Total ion flow chromatograms of synthetic products. (A) 2-nitro-4-thiocyananiline; (B) 4-amino-3-nitrobenzenethiol; (C) 3,4-diaminobenzenethiol.
